# Supplementary material
Source: Research Square preprint supplement (doi:10.21203/rs.3.rs-9430050/v1)
Supplement: Supplementary file 1 [file 836723840fac9dbe03771094.docx]

DATA COLLECTION AND DATA COLLECTION TOOLS **QUESTIONNAIRE:**

**TITLE:** **Monocyte to HDL-Cholesterol ratio as a predictor of hyperuricemia among hypertensive patients at Bwizibwera health Centre IV, Mbarara District, Uganda.**

| PARTICIPANT CODE |  | DATE |  |
| --- | --- | --- | --- |

**All questions contained in this questionnaire are strictly confidential and are viewed only by the research team**

**Instructions:** Write a specific number, tick or fill with the appropriate response

| **SECTION A: SOCIO DEMOGRAPHICS** | | | | | | | | | | |
| --- | --- | --- | --- | --- | --- | --- | --- | --- | --- | --- |
| **1** | | Sex | | Male ☐ | Female ☐ | | |  | |  |
| **2** | | Age | | ………Years |  | | |  | |  |
| **3** | | What is your marital status? | | Single ☐ | Married ☐ | | | Separated or divorced ☐ | |  |
| **4** | | What is your level of Education? | | No education ☐ | Primary Education ☐ | | | Secondary  Education ☐ | | Tertiary  Education ☐ |
| **5** | | What is your religious affiliation? | | Catholic ☐ | Muslim ☐ | | | Protestant ☐ | | Others  …………… |
| **6** | | What is your employment status? | | Peasant ☐ | Self Employed ☐ | | | Professional ☐ | |  |
| **7** | | Residence | | Rural ☐ | Urban ☐ | | |  | |  |
| **8** | | HIV | | 1=Negative | 2=Positive | | | 9. Duration with Hypertension  …… months/year | | |
| **10** | | Diabetes | 1=No ☐ | 2=Yes ☐ | 11.Heart disease | | | 1= No ☐ | | 2= Yes ☐ |
| **12** | | Thyroid condition | | 1= No ☐ | 2= Yes ☐ | | |  | |  |
| **SECTION B: LIFESTYLE FACTORS** | | | | | | | | | | |
| **13** | | Smoking Status | | 1=Never  ☐ | 2=Former ☐ | | | 3=Current ☐ | |  |
|  | | **SMOKING HABIT SCREENING** | | | | | | | | |
| How many cigarettes do you smoke daily? | | | | <10 | 11-20 | | | 20-30 | | >30 |
| 0☐ | 1☐ | | | 2☐ | | 3☐ |
| How soon after awakening do you smoke? | | | | <5min | 6-30min | | | 31-60min | | >60min |
| 3☐ | 2☐ | | | 1☐ | | 0☐ |
| Which cigarettes would be most difficult to give up? First in am | | | | | | | | First in am ☐ | | Any other ☐ |
| Is it hard to refrain from smoking where it is forbidden? | | | | | | | | 1=Yes ☐ | | 0=No ☐ |
| Do you smoke even though you are sick in bed all day? | | | | | | | | 1=Yes ☐ | | 0=No ☐ |
| Do you smoke more often in the first few hours of the day compared to the rest of the day? | | | | | | | | 1=Yes ☐ | | 0=No ☐ |
| **Total** | | | | | | | |  | |  |
| **Scoring:**  **7 – 10 = highly dependent, 5-6 = moderately dependent, 0-4 = minimally dependent** | | | | | | | | | | |
| **14** | | Alcohol consumption | | 1=Never ☐ | 2=Former ☐ | | | 3=Current ☐ | |  |
|  | | | | 0 | 1 | | 2 | 3 | 4 | SCORE |
| How often do you have a drink that contains alcohol? | | | | Never | Monthly  or less | | 2-4 times a month | 2-3 times a week | 4+ times a  week |  |
| How many standard drinks alcoholic drinks do you have on a typical day when you are drinking? | | | | 1-2 | 3-4 | | 5-6 | 7-9 | 10+ |  |
| How often do you 6 or more standard drinks on one occasion day? | | | | NEVER | Less than monthly | | monthly | weekly | Daily or almost daily |  |
| How often in the last year have you found that you were not able to stop drinking once you had started? | | | | NEVER | Less than monthly | | monthly | weekly | Daily or almost daily |  |
| How often have you had a feeling of guilt or regret after drinking? | | | | NEVER | Less than monthly | | monthly | weekly | Daily or almost daily |  |
| How often have you had in the last year have you needed an alcoholic drink in the morning to get going? | | | | NEVER | Less than monthly | | monthly | weekly | Daily or almost daily |  |
| How often have you not been able to remember what happened when drinking the night? | | | | NEVER | Less than monthly | | monthly | weekly | Daily or almost daily |  |
| Have you or someone else been injured because of drinking? | | | | NEVER | Less than monthly | | monthly | weekly | Daily or almost daily |  |
| Has a relative/friend/Doctor/health worker been concerned about your drinking or suggested you cut down? | | | | NEVER | Less than monthly | | monthly | weekly | Daily or almost daily |  |
| **TOTAL** | | | | | | | | | |  |
| **SCORING: 0-7 =Sensible drinking 16 – 19 = Harmful drinking 8-15 = Hazardous drinking 20+ = Possible Dependence** | | | | | | | | | | |
| 14 | **DIET** | | |  | |  | |  | |  |
| a) Vegetables and fluid intake | | | | 1= <5 servings per day ☐ | | | | 2= ≥5 servings per day ☐ | | |
| b) No. of days consuming  fruit and vegetables per  week | | | | 1= ≤4days ☐ | | | | 2= >4days ☐ | | |
| a) Red meat intake | | | | 1= <5 servings per day ☐ | | | | 2= ≥5 servings per day ☐ | | |
| b) No. of days consuming red meat per week | | | | 1= ≤4days ☐ | | | | 2= >4days ☐ | | |
| a) Milk consumption | | | | 1= <5 servings per day ☐ | | | | 2= ≥5 servings per day ☐ | | |
| b) No. of days consuming milk per week | | | | 1= ≤4days ☐ | | | | 2= >4days ☐ | | |
| Are you on diet | | | | 1= Yes | | | | 0= No | | |
| Fast foods | | | | 1= Yes | | | | 0= No | | |
| c) Nutritional status (Mid Upper Arm Circumference, MUAC)  …………………………. Cm | | | | | | | | | | |
| d)When do you usually have dinner | | | | 1=Before 8pm ☐ | | | | 2=After 8pm ☐ | | |
| **16** | **Physical activity; International Physical Activity Questionnaires (IPAQ)**  Think about all the vigorous activities that you have done in the last 7 days. Vigorous physical activities refer to activities that take hard physical effort and make you breathe much harder than normal. Think only about those physical activities that you did for at least 10 minutes at a time. | | | | | | | | | |
| 1. During the last 7 days, on how many days did you do vigorous physical activities like heavy lifting, digging, aerobics, or fast bicycling?  _____ days per week  No vigorous physical activities Skip to question 3 | | | | | | | | | | |
| 2. How much time do you usually spend doing vigorous physical activities on one of those days? _____ hours per day _____ minutes per day Don’t know/Not sure | | | | | | | | | | |
| Think about all the moderate activities that you did in the last 7 days. Moderate activities refer to activities that take moderate physical effort and make you breathe somewhat harder than normal.  Think only about those physical activities that you did for at least 10 minutes at a time. | | | | | | | | | | |
| 3. During the last 7 days, on how many days did you do moderate physical activities like carrying light loads, bicycling at a regular pace, or doubles tennis? Do not include walking.  _____ days per week  No moderate physical activities Skip to question 5 | | | | | | | | | | |
| 4. How much time did you usually spend doing moderate physical activities on one of those days? _____ hours per day _____ minutes per day  Don’t know/Not sure | | | | | | | | | | |
| Think about the time you spent walking in the last 7 days. This includes at work and at home, walking from place to place, and any other walk that you have done solely for recreation, sport, exercise, or leisure. | | | | | | | | | | |
| 5. During the last 7 days, on how many days did you walk for at least 10 minutes at a time?  _____ days per week  No walking Skip to question 7 | | | | | | | | | | |
| 6. How much time did you usually spend walking on one of those days?  _____ hours per day _____ minutes per day  Don’t know/Not sure | | | | | | | | | | |
| The last question is about the time you spent sitting on weekdays during the last 7 days. Include time spent at work, at home, while doing course work and during leisure time. This may include time spent sitting at a desk, visiting friends, reading, or sitting or lying down to watch television. | | | | | | | | | | |
| 7. During the last 7 days, how much time did you spend sitting on a weekday?  _____ hours per day _____ minutes per day  Don’t know/Not sure | | | | | | | | | | |
| **17** | **Sleep Parameters** | | |  | |  | |  | |  |
| 1. During the past month, when have you usually gone to bed at night?  Usual bedtime………………… | | | | | | | | | | |
| 2. During the past month, when have you usually gotten up in the morning?  Usual getting up time……………  Hours spent in bed…………. hrs.  Interpretation: <6hours, 6-8hours, >8hours | | | | | | | | | | |
| 3. During the past month, how many hours of actual sleep did you get at night?  Hours of sleep per night………hrs.  Interpretation (sleep duration): <5hours, 5-7hours, >7hours | | | | | | | | | | |
| 4. How do you rate your sleep quality? | | | | | | 1= Poor ☐ | | 2= Moderate ☐ | | 3= Good ☐ |
| 5. Obstructive Sleep Apnea OSA (Stop Bang scoring model) | | | | | | | | | | |
| a. Snoring  Do you snore loudly (louder than talking or loud enough to be heard through the closed doors? | | | | | | | | 1= Yes ☐ | | 2= No ☐ |
| b. Tired  Do you feel tired, fatigued or sleepy during the day? | | | | | | | | 1= Yes ☐ | | 2= No ☐ |
| c. Blood pressure  Do you have or have you been treated for blood pressure? | | | | | | | | 1= Yes ☐ | | 2= No ☐ |
| d. BMI  Body mass index greater than 35kg/m2? | | | | | | | | 1= Yes ☐ | | 2= No ☐ |
| e. Age  Over 50 years? | | | | | | | | 1= Yes ☐ | | 2= No ☐ |
| f. Neck circumference  Neck circumference greater than 40 cm? | | | | | | | | 1= Yes ☐ | | 2= No ☐ |
| g. Gender: Male? | | | | | | | | 1= Yes ☐ | | 2= No ☐ |
| **Interpretation**  Low risk of OSA: Answering Yes to less than three items  High risk of OSA: Answering Yes to three or more items | | | | | | | | | | |
| **18** | **Morisky Medication Adherence Scale (MMAS-8) (Adherence to hypertension medication)** | | | | | | | | | |
| a. Do you sometimes forget to take your medications? | | | | | | | | 0= Yes ☐ | | 1= No ☐ |
| b. People sometimes miss taking their medications for reasons other than forgetting. Thinking over the past two weeks, were there any days when you did not take your medicines? | | | | | | | | 0= Yes ☐ | | 1= No ☐ |
| c. Have you ever cut back or stopped taking your medication without telling your doctor, because you felt worse when you took it? | | | | | | | | 0= Yes ☐ | | 1= No ☐ |
| d. When you travel or leave home, do you sometimes forget to bring along your medications? | | | | | | | | 0= Yes ☐ | | 1= No ☐ |
| e. Did you take your medication yesterday? | | | | | | | | 0= Yes ☐ | | 1= No ☐ |
| f. When you feel like your condition is under control, do you sometimes stop taking your medicines? | | | | | | | | 0= Yes ☐ | | 1= No ☐ |
| g. Taking medication every day is a real inconvenience for some people. Do you ever feel hassled about sticking to your treatment plan | | | | | | | | 0= Yes ☐ | | 1= No ☐ |
| h. How often do you have difficulty remembering to take all your medications? Never/rarely (1)  Once in a while (0),  Sometimes (0)  Usually (0),  All the time (0).  Total score………………. | | | | | | | | | | |
| **Interpretation**  1.Low adherence: score <6  2.Moderate adherence: score 6-7  3. High adherence: score 8 | | | | | | | | | | |
| **CLINICAL FACTORS** | | | | | | | | | | |
| **22.** Family history of hypertension | | | | | | | | 1= No ☐ | | 2= Yes ☐ |
| 23 | Family history of kidney disease | | | | | | | 1= No ☐ | | 2= Yes ☐ |
| 24 | Family history of cardiovascular diseases | | | | | | | 1= No ☐ | | 2= Yes ☐ |
| 25 | Family history of dyslipidemia? | | | | | | | 1= No ☐ | | 2= Yes ☐ |
| 26 | History of stroke | | | | | | | 1= No ☐ | | 2= Yes ☐ |
| 27 | Family history of dementia? | | | | | | | 1= No ☐ | | 2= Yes ☐ |
| 28 | History of Cerebral malaria | | | | | | | 1= No ☐ | | 2= Yes ☐ |
| 29 | History of Tuberculosis | | | | | | | 1= No ☐ | | 2= Yes ☐ |
| 30 | History of Meningitis | | | | | | | 1= No ☐ | | 2= Yes ☐ |
| 31 | History of Traumatic head injury | | | | | | | 1= No ☐ | | 2= Yes ☐ |
| 32 | History of Epilepsy | | | | | | | 1= No ☐ | | 2= Yes ☐ |
| 33 | History of COVID-19 | | | | | | | 1= No ☐ | | 2= Yes ☐ |
| 34 | Weight Measurement | | | | | | | 1= No ☐ | | 2= Yes ☐ |
| 35 | Height Measurement | | | | | | | 1= No ☐ | | 2= Yes ☐ |
| 36 | Blood pressure Measurements | | | | | | | SBP……mmHg | | DBP….mmHg |
| 37 | Waist circumference ……………cm | | | | | 38. Hip circumference ……………………….cm | | | | |
|  | **HYPERTENSION RELATED FACTORS** | | | | |  | | | | |
| 39 | Duration with Hypertension  ………………………………years | | | | | 40. Duration on medication  ………………….years | | | | |
| 41 | Type of medication  1= Non-diuretic  2= Diuretic | | | | | 42. Stage of hypertension  1=stage 1  2=stage 2 | | | | |
| **BIOCHEMICAL MEASUREMENTS** | | | | | | | | | | |
| 43 | HDL-Cholesterol………………………. | | | | | | | | | |
| 44 | CBC Parameters……………………….. | | | | | | | | | |
| 45 | Uric acid……………………………………. | | | | | | | | | |
